# Supplementary material for: Diversity of Microbial Communities in Production and Injection Waters of Algerian Oilfields Revealed by 16S rRNA Gene Amplicon 454 Pyrosequencing
Source: PubMed Central journal article supplement (PMC3689743; doi:10.1371/journal.pone.0066588), 2013-06-21
Supplement: pone.0066588.s004.pdf [file pone.0066588.s004.pdf]

**Table S3****(A)**

| <b>Phylum/class</b>          | <b>PNFT1</b> | <b>PNFT2</b> | <b>PFOH1</b> | <b>PFOH2</b> | <b>PFS1</b> | <b>IS2</b> | <b>IT3</b> | <b>IBD</b> |
|------------------------------|--------------|--------------|--------------|--------------|-------------|------------|------------|------------|
| <b>Acidobacteria</b>         | 0,00         | 0,71         | 0,00         | 0,00         | 0,00        | 0,34       | 0,00       | 0,00       |
| <b>Actinobacteria</b>        | 42,78        | 3,67         | 1,98         | 0,00         | 3,49        | 2,24       | 1,55       | 1,28       |
| <b>BRC1</b>                  | 0,07         | 0,00         | 0,00         | 0,00         | 0,00        | 0,00       | 0,00       | 0,00       |
| <b>Bacteroidetes</b>         | 4,08         | 1,41         | 0,21         | 0,00         | 4,76        | 0,34       | 2,65       | 1,02       |
| <b>Chloroflexi</b>           | 2,93         | 0,00         | 0,31         | 0,00         | 0,00        | 0,00       | 0,00       | 0,00       |
| <b>Cyanobacteria</b>         | 1,65         | 0,28         | 0,10         | 0,00         | 0,76        | 0,09       | 0,00       | 0,00       |
| <b>Deferribacteres</b>       | 0,00         | 0,00         | 0,10         | 0,00         | 0,00        | 0,00       | 0,00       | 0,00       |
| <b>Firmicutes</b>            | 4,15         | 15,23        | 2,29         | 0,00         | 6,92        | 0,78       | 0,22       | 0,13       |
| <b>Fusobacteria</b>          | 0,00         | 0,00         | 0,00         | 0,00         | 0,25        | 0,00       | 0,00       | 0,06       |
| <b>GN02</b>                  | 0,00         | 0,00         | 0,00         | 0,00         | 0,00        | 0,00       | 1,55       | 1,34       |
| <b>Hyd24-12</b>              | 0,00         | 0,00         | 0,10         | 0,00         | 0,00        | 0,00       | 0,00       | 0,00       |
| <b>Planctomycetes</b>        | 0,43         | 0,56         | 0,00         | 0,00         | 0,00        | 2,41       | 1,77       | 0,19       |
| <b>SBR1093</b>               | 0,00         | 0,00         | 0,00         | 0,00         | 0,00        | 0,00       | 0,44       | 0,19       |
| <b>SR1</b>                   | 0,00         | 0,00         | 0,00         | 0,00         | 0,19        | 0,00       | 0,00       | 0,00       |
| <b>Thermi</b>                | 0,07         | 2,54         | 0,10         | 0,00         | 0,25        | 0,00       | 0,44       | 0,06       |
| <b>Verrucomicrobia</b>       | 0,07         | 0,00         | 0,00         | 0,00         | 0,00        | 0,00       | 0,22       | 0,00       |
| <b>uncl.bacteria</b>         | 3,79         | 4,94         | 5,93         | 0,00         | 0,32        | 6,55       | 10,84      | 6,14       |
| <b>Alphaproteobacteria</b>   | 19,74        | 17,91        | 54,99        | 7,53         | 12,19       | 30,23      | 52,21      | 50,06      |
| <b>Betaproteobacteria</b>    | 5,65         | 39,35        | 2,39         | 78,66        | 40,06       | 27,91      | 8,63       | 8,70       |
| <b>Deltaproteobacteria</b>   | 0,43         | 0,00         | 0,10         | 0,00         | 0,00        | 0,26       | 0,44       | 10,29      |
| <b>Epsilonproteobacteria</b> | 0,00         | 0,00         | 0,00         | 0,00         | 0,00        | 0,00       | 0,22       | 0,00       |
| <b>Gammaproteobacteria</b>   | 13,66        | 13,26        | 27,86        | 13,81        | 30,79       | 28,17      | 18,14      | 17,84      |
| <b>uncl.Proteobacteria</b>   | 0,50         | 0,14         | 3,53         | 0,00         | 0,00        | 0,69       | 0,66       | 2,69       |



|                                |      |       |       |       |       |      |      |      |
|--------------------------------|------|-------|-------|-------|-------|------|------|------|
| <b>Hyphomonas</b>              | 0,00 | 0,00  | 0,10  | 0,00  | 0,00  | 0,00 | 1,11 | 0,19 |
| <b>uncl.Alteromonadaceae</b>   | 0,00 | 0,00  | 0,10  | 0,00  | 0,00  | 0,00 | 0,22 | 0,19 |
| <b>unclassified</b>            | 0,72 | 0,56  | 0,10  | 0,00  | 0,00  | 2,41 | 0,00 | 0,19 |
| <b>Hydrogenophaga</b>          | 0,00 | 0,42  | 0,00  | 0,00  | 1,14  | 0,00 | 1,11 | 0,19 |
| <b>uncl.Puniceicoccaceae</b>   | 0,00 | 0,00  | 0,00  | 0,00  | 0,00  | 0,00 | 0,44 | 0,19 |
| <b>uncl.Desulfovibrionales</b> | 0,00 | 0,00  | 0,00  | 0,00  | 0,00  | 0,00 | 0,00 | 0,19 |
| <b>uncl.Rhodobacteraceae</b>   | 4,22 | 0,00  | 12,99 | 0,00  | 0,00  | 0,00 | 0,44 | 0,13 |
| <b>Acidocella</b>              | 1,50 | 3,53  | 0,31  | 0,42  | 0,25  | 0,17 | 0,00 | 0,13 |
| <b>Devosia</b>                 | 1,50 | 0,71  | 0,21  | 0,00  | 0,00  | 1,29 | 1,55 | 0,13 |
| <b>uncl.Sphingomonadaceae</b>  | 0,07 | 0,56  | 0,10  | 0,00  | 0,00  | 0,00 | 0,44 | 0,13 |
| <b>Propionibacterium</b>       | 1,14 | 2,68  | 0,10  | 0,00  | 1,02  | 0,00 | 0,00 | 0,13 |
| <b>uncl.Comamonadaceae</b>     | 1,36 | 0,00  | 0,00  | 0,00  | 2,35  | 0,52 | 0,00 | 0,13 |
| <b>Staphylococcus</b>          | 0,64 | 11,42 | 0,00  | 0,00  | 0,57  | 0,09 | 0,00 | 0,13 |
| <b>uncl.GN02</b>               | 0,00 | 0,00  | 0,00  | 0,00  | 0,00  | 0,00 | 0,00 | 0,13 |
| <b>Zobellella</b>              | 0,00 | 0,00  | 0,00  | 0,00  | 0,00  | 0,00 | 0,00 | 0,13 |
| <b>Rheinheimera</b>            | 0,00 | 0,00  | 0,00  | 0,00  | 0,00  | 0,00 | 0,00 | 0,13 |
| <b>Acinetobacter</b>           | 0,43 | 5,36  | 2,08  | 0,00  | 21,59 | 1,46 | 0,22 | 0,06 |
| <b>Petrobacter</b>             | 1,72 | 31,73 | 1,04  | 78,24 | 0,06  | 0,00 | 0,00 | 0,06 |
| <b>uncl.Patulibacteraceae</b>  | 0,00 | 0,00  | 0,94  | 0,00  | 0,00  | 0,00 | 0,00 | 0,06 |
| <b>uncl.Phylobacteriaceae</b>  | 0,00 | 0,00  | 0,10  | 0,00  | 0,00  | 0,09 | 0,66 | 0,06 |
| <b>Meiothermus</b>             | 0,07 | 2,54  | 0,10  | 0,00  | 0,25  | 0,00 | 0,44 | 0,06 |
| <b>uncl.Actinomycetales</b>    | 7,73 | 0,14  | 0,10  | 0,00  | 0,00  | 0,00 | 0,00 | 0,06 |
| <b>Maricaulis</b>              | 0,00 | 0,00  | 0,10  | 0,00  | 0,00  | 0,00 | 0,00 | 0,06 |
| <b>uncl.Pirellulales</b>       | 0,43 | 0,00  | 0,00  | 0,00  | 0,00  | 0,00 | 0,66 | 0,06 |
| <b>A17</b>                     | 0,00 | 0,00  | 0,00  | 0,00  | 0,00  | 0,00 | 0,44 | 0,06 |
| <b>Azohydromonas</b>           | 0,00 | 0,99  | 0,00  | 0,42  | 3,94  | 1,81 | 0,00 | 0,06 |
| <b>uncl.Burkholderiales</b>    | 0,50 | 0,56  | 0,00  | 0,00  | 1,65  | 3,88 | 0,00 | 0,06 |
| <b>Planctomyces</b>            | 0,00 | 0,56  | 0,00  | 0,00  | 0,00  | 2,33 | 0,00 | 0,06 |
| <b>Rhodoplanes</b>             | 0,00 | 0,56  | 0,00  | 0,00  | 0,00  | 0,17 | 0,00 | 0,06 |
| <b>Sphingomonas</b>            | 0,00 | 0,28  | 0,00  | 0,00  | 0,32  | 0,00 | 0,00 | 0,06 |
| <b>Fusobacterium</b>           | 0,00 | 0,00  | 0,00  | 0,00  | 0,06  | 0,00 | 0,00 | 0,06 |
| <b>Dietzia</b>                 | 0,93 | 0,00  | 0,00  | 0,00  | 0,00  | 0,00 | 0,00 | 0,06 |
| <b>Lutibacterium</b>           | 0,36 | 0,00  | 0,00  | 0,00  | 0,00  | 0,00 | 0,00 | 0,06 |
| <b>uncl.AKIW874</b>            | 0,00 | 0,00  | 0,00  | 0,00  | 0,00  | 0,00 | 0,00 | 0,06 |
| <b>Bradyrhizobium</b>          | 0,00 | 0,00  | 0,00  | 0,00  | 0,00  | 0,00 | 0,00 | 0,06 |
| <b>Catellibacterium</b>        | 0,00 | 0,00  | 0,00  | 0,00  | 0,00  | 0,00 | 0,00 | 0,06 |
| <b>Aromatoleum</b>             | 0,00 | 0,00  | 0,00  | 0,00  | 0,00  | 0,00 | 0,00 | 0,06 |
| <b>f_Pseudomonadaceae</b>      | 0,00 | 0,00  | 0,00  | 0,00  | 0,00  | 0,00 | 0,00 | 0,06 |
| <b>Marinobacterium</b>         | 0,00 | 0,00  | 16,42 | 0,00  | 0,00  | 0,00 | 0,00 | 0,00 |
| <b>Agrobacterium</b>           | 0,00 | 1,83  | 5,09  | 5,44  | 8,63  | 0,52 | 0,66 | 0,00 |
| <b>Marinobacter</b>            | 0,00 | 0,00  | 4,89  | 0,00  | 0,00  | 0,00 | 0,00 | 0,00 |
| <b>Exiguobacterium</b>         | 0,00 | 0,00  | 2,18  | 0,00  | 0,00  | 0,00 | 0,00 | 0,00 |
| <b>uncl.Rhodobacterales</b>    | 0,07 | 0,00  | 2,08  | 0,00  | 0,00  | 0,00 | 0,00 | 0,00 |
| <b>Haererehalobacter</b>       | 0,00 | 0,00  | 1,14  | 0,00  | 0,00  | 0,00 | 0,00 | 0,00 |



|                                |       |      |      |      |      |      |      |      |
|--------------------------------|-------|------|------|------|------|------|------|------|
| <b>Pseudoxanthomonas</b>       | 0,00  | 0,99 | 0,00 | 4,18 | 0,38 | 0,00 | 0,00 | 0,00 |
| <b>Ochrobactrum</b>            | 0,00  | 0,42 | 0,00 | 1,26 | 0,00 | 0,00 | 0,00 | 0,00 |
| <b>Tessaracoccus</b>           | 3,79  | 0,00 | 0,00 | 0,00 | 0,00 | 0,00 | 0,00 | 0,00 |
| <b>uncl.HN1-15</b>             | 2,93  | 0,00 | 0,00 | 0,00 | 0,00 | 0,00 | 0,00 | 0,00 |
| <b>uncl.Micrococcaceae</b>     | 2,43  | 0,14 | 0,00 | 0,00 | 0,00 | 0,00 | 0,00 | 0,00 |
| <b>Georgenia</b>               | 2,43  | 0,00 | 0,00 | 0,00 | 0,00 | 0,00 | 0,00 | 0,00 |
| <b>Planomicrobium</b>          | 1,93  | 0,00 | 0,00 | 0,00 | 0,00 | 0,00 | 0,00 | 0,00 |
| <b>Roseomonas</b>              | 1,22  | 0,42 | 0,00 | 0,00 | 0,00 | 0,00 | 0,00 | 0,00 |
| <b>Chroococciopsis</b>         | 1,22  | 0,00 | 0,00 | 0,00 | 0,00 | 0,00 | 0,00 | 0,00 |
| <b>Lysobacter</b>              | 1,14  | 0,00 | 0,00 | 0,00 | 0,00 | 0,00 | 0,00 | 0,00 |
| <b>Streptococcus</b>           | 0,00  | 0,14 | 0,00 | 0,00 | 5,08 | 0,00 | 0,00 | 0,00 |
| <b>Wautersiella</b>            | 0,00  | 0,00 | 0,00 | 0,00 | 3,43 | 0,00 | 0,00 | 0,00 |
| <b>Stenotrophomonas</b>        | 0,57  | 0,00 | 0,00 | 0,00 | 2,10 | 0,00 | 0,00 | 0,00 |
| <b>uncl.Alteromonadales</b>    | 0,00  | 0,00 | 0,00 | 0,00 | 1,59 | 0,00 | 0,00 | 0,00 |
| <b>Caulobacter</b>             | 0,00  | 0,00 | 0,00 | 0,00 | 1,27 | 0,00 | 0,00 | 0,00 |
| <b>uncl.Enterobacteriaceae</b> | 0,29  | 0,00 | 0,00 | 0,00 | 1,08 | 0,00 | 0,00 | 0,00 |
| <b>Kocuria</b>                 | 1,36  | 0,00 | 0,00 | 0,00 | 0,00 | 0,09 | 0,00 | 0,00 |
| <b>Polaromonas</b>             | 0,00  | 0,00 | 0,00 | 0,00 | 0,95 | 0,00 | 0,00 | 0,00 |
| <b>others</b>                  | 22,46 | 7,90 | 0,00 | 0,00 | 9,27 | 3,36 | 0,00 | 0,00 |
